# Supplementary material for: Deletion of the Imprinted Phlda2 Gene Increases Placental Passive Permeability in the Mouse
Source: MDPI journal article supplement (doi:10.3390/genes12050639), 2021-04-25
Supplement: s1 [file s1]

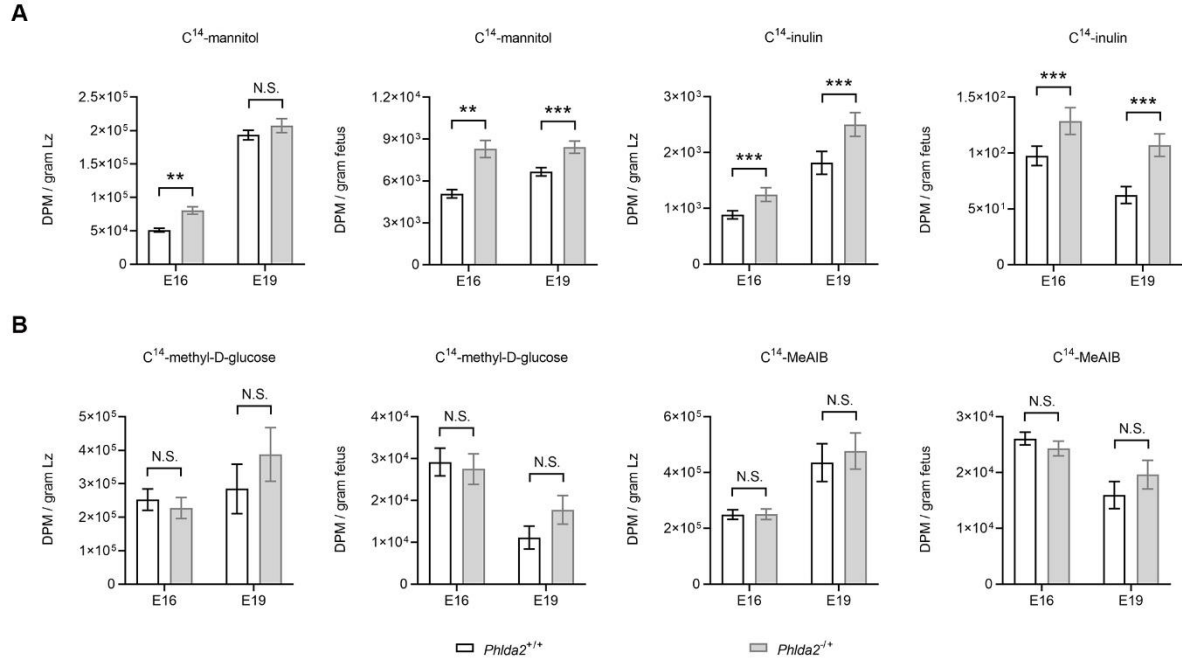

**Figure S1.** Placental transfer of (A) passive permeability markers ( $^{14}\text{C}$ -mannitol and  $^{14}\text{C}$ -inulin) and (B) facilitated and active transport markers ( $^{14}\text{C}$ -methyl-D-glucose and  $^{14}\text{C}$ -MeAIB, respectively) in *Phlda2*<sup>-/-</sup>, expressed either as DPM (disintegrations per minute) per gram of labyrinthine zone (Lz) or as DPM per gram of fetus at two gestational ages (E16 and E19). E16:  $^{14}\text{C}$ -mannitol,  $n = 12$  *Phlda2*<sup>+/+</sup> and  $n = 15$  *Phlda2*<sup>-/-</sup> from 4 litters;  $^{14}\text{C}$ -inulin,  $n = 31$  *Phlda2*<sup>+/+</sup> and  $n = 32$  *Phlda2*<sup>-/-</sup> from 8 litters;  $^{14}\text{C}$ -methyl-D-glucose,  $n = 20$  *Phlda2*<sup>+/+</sup> and  $n = 17$  *Phlda2*<sup>-/-</sup> from 6 litters;  $^{14}\text{C}$ -MeAIB,  $n = 16$  *Phlda2*<sup>+/+</sup> and  $n = 17$  *Phlda2*<sup>-/-</sup> from 5 litters. E19:  $^{14}\text{C}$ -mannitol,  $n = 26$  *Phlda2*<sup>+/+</sup> and  $n = 35$  *Phlda2*<sup>-/-</sup> from 9 litters;  $^{14}\text{C}$ -inulin,  $n = 22$  *Phlda2*<sup>+/+</sup> and  $n = 18$  *Phlda2*<sup>-/-</sup> from 5 litters;  $^{14}\text{C}$ -methyl-D-glucose,  $n = 18$  *Phlda2*<sup>+/+</sup> and  $n = 20$  *Phlda2*<sup>-/-</sup> from 5 litters;  $^{14}\text{C}$ -MeAIB,  $n = 48$  *Phlda2*<sup>+/+</sup> and  $n = 42$  *Phlda2*<sup>-/-</sup> from 13 litters. Bars indicate standard error of the mean (SE). \*\*,  $P < 0.01$ ; \*\*\*,  $P < 0.001$ ; N.S. – non-significant.
